# Supplementary material for: MGDF: an embedded multi-graph deep learning method for crude oil price forecasting
Source: Research Square preprint supplement (doi:10.21203/rs.3.rs-7588475/v1), 2025-09-16
Supplement: Supplementary file 1 [file 1f4050cf69540fc0d74440f9.docx]

**MGDF: an embedded multi-graph deep learning method for crude oil price forecasting**

**Support Materials**


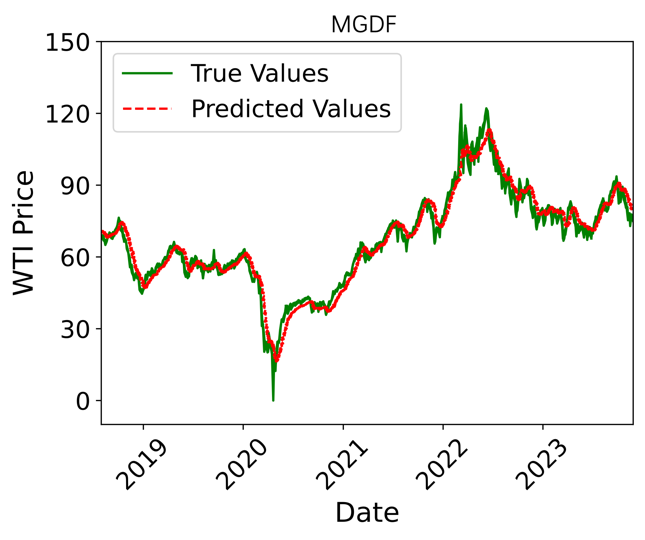

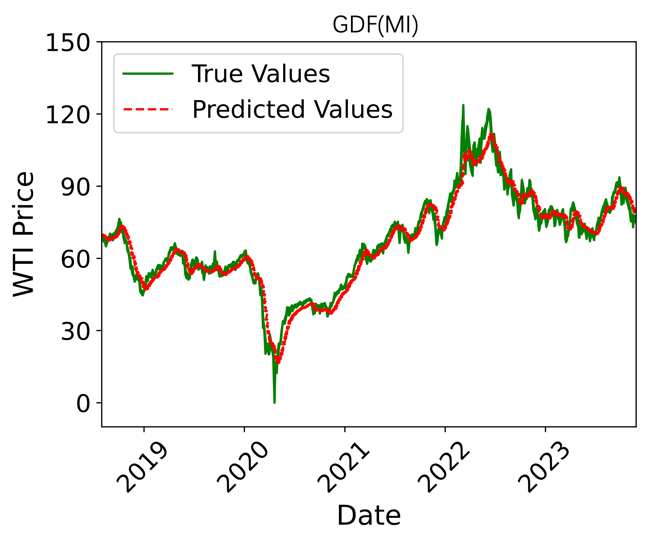

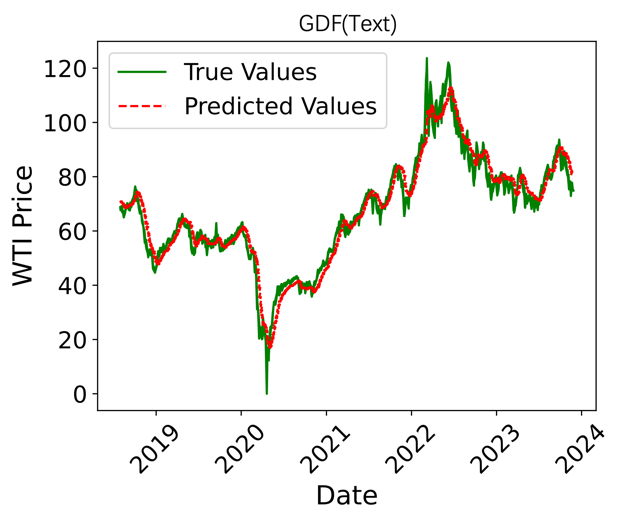


**Fig. S1*****(Part 1)*** Predicted values versus actual values for each model for 5 days prediction


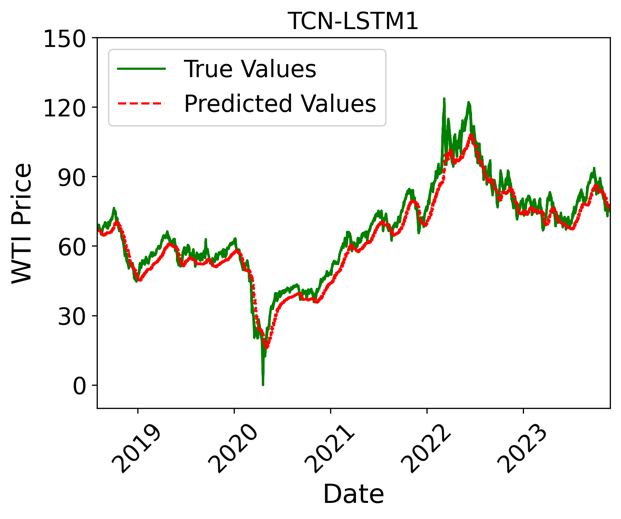

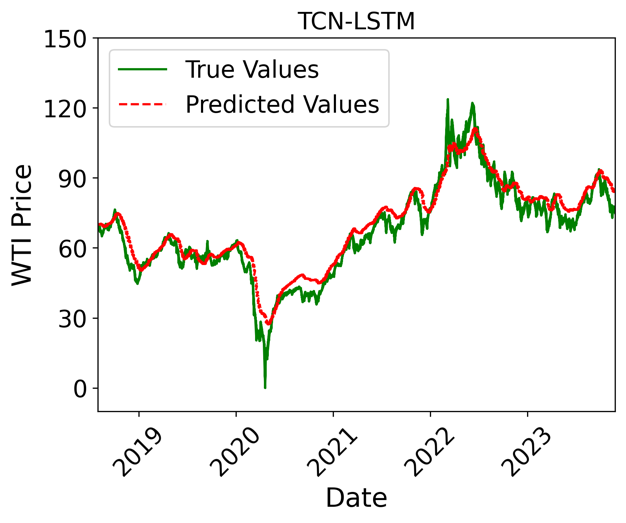

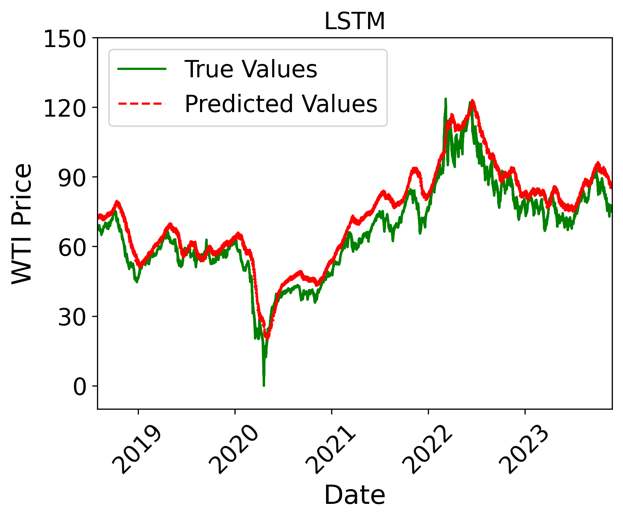


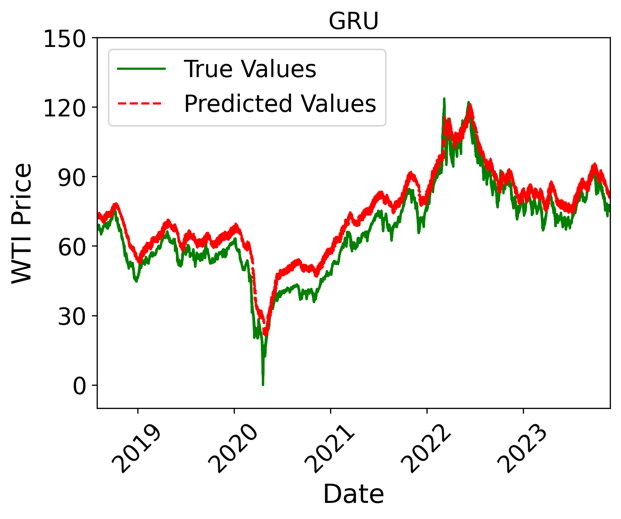

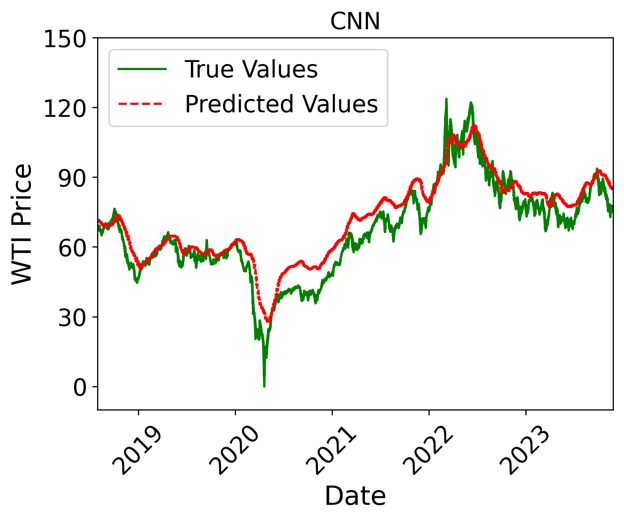

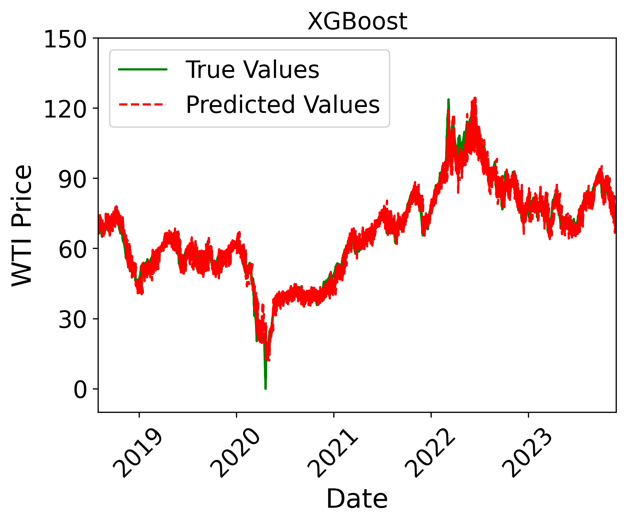


**Fig. S1** ***(Part 2)*** Predicted values versus actual values for each model for 5 days prediction


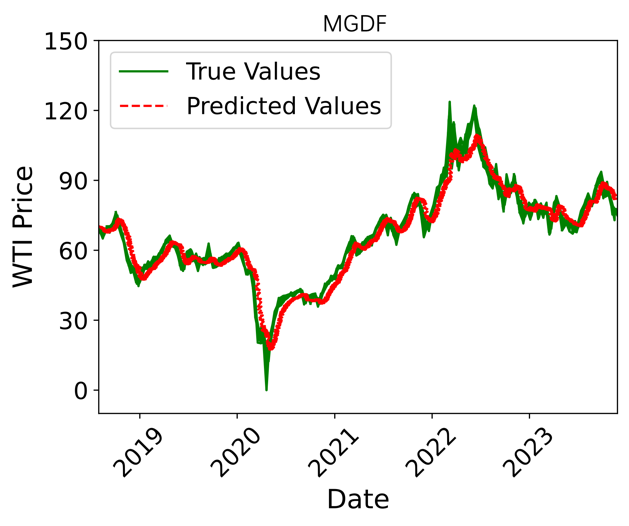

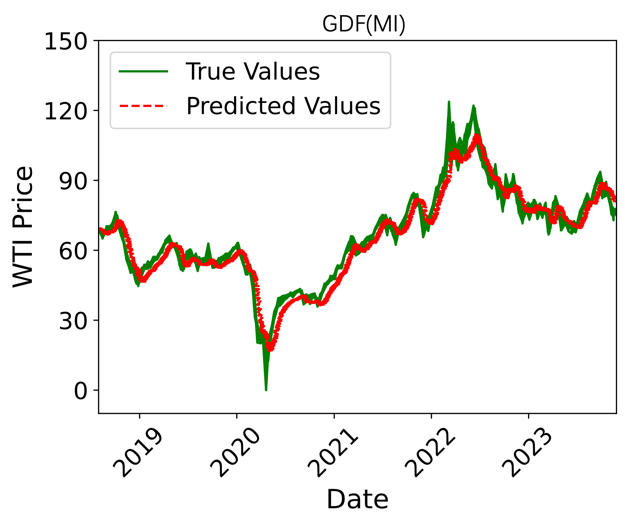

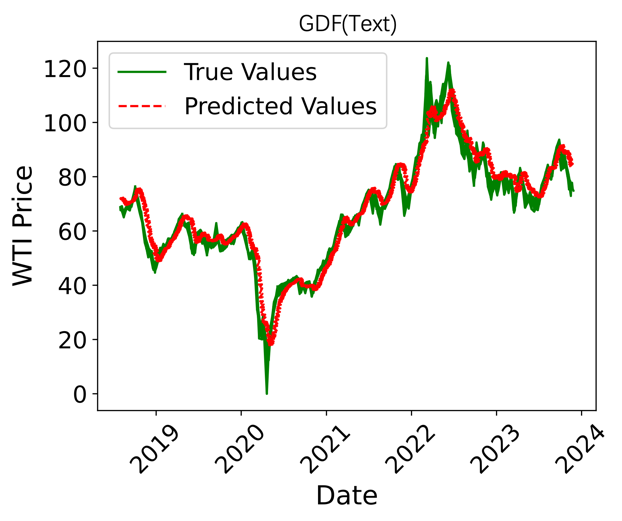


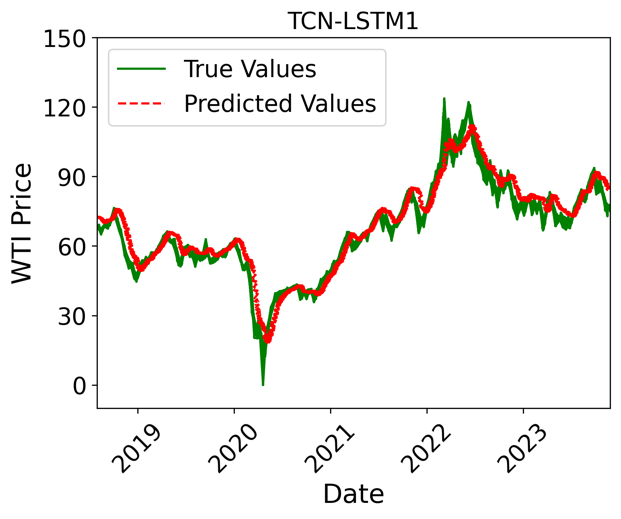

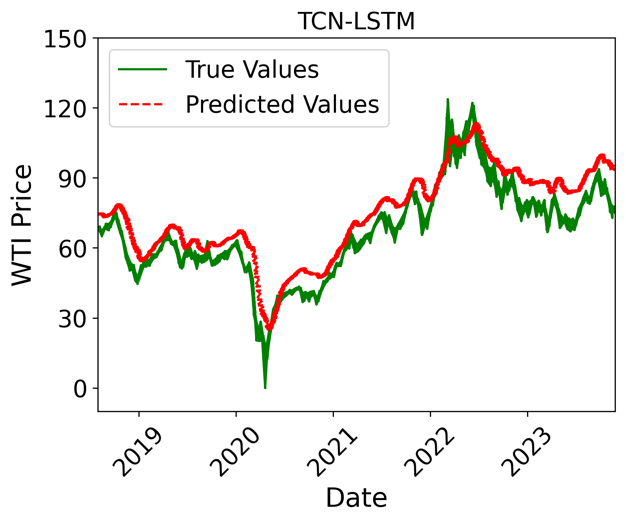

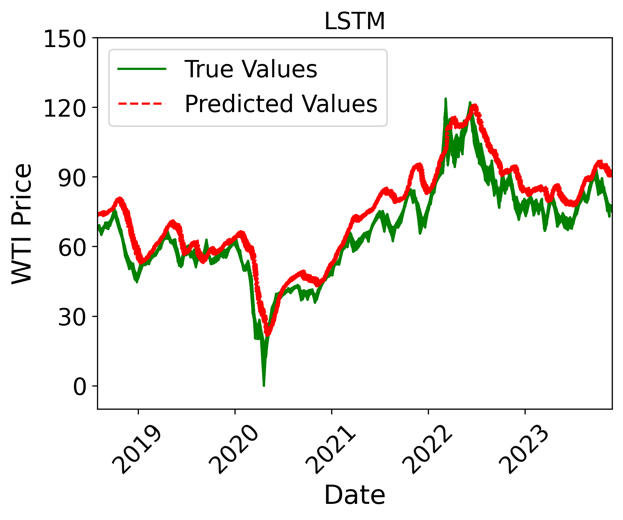


**Fig. S2** ***(Part 1)*** Predicted values versus actual values for each model for 10 days prediction


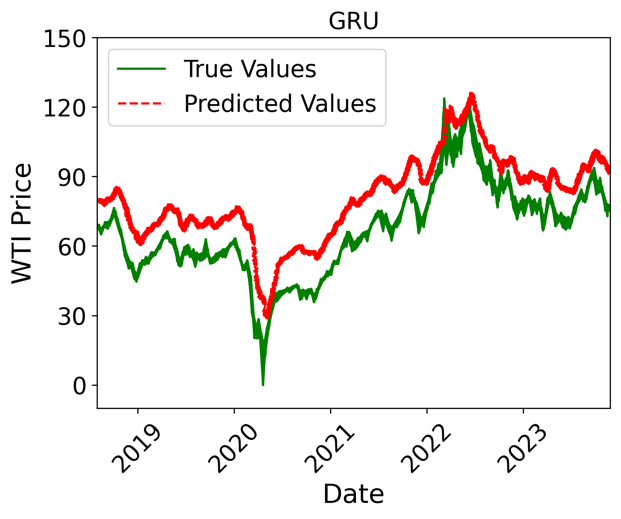

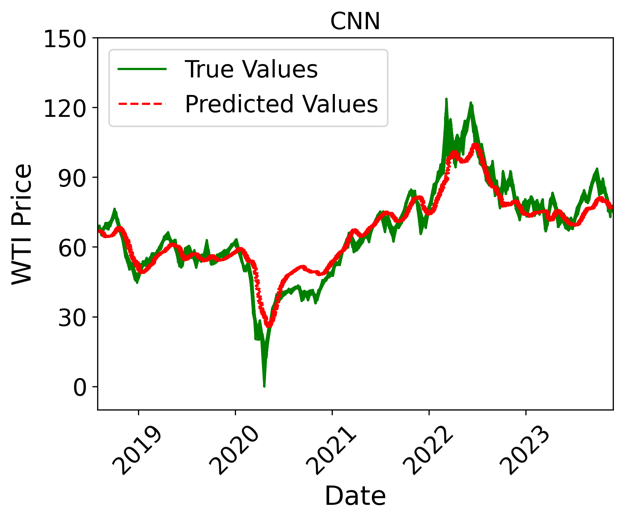

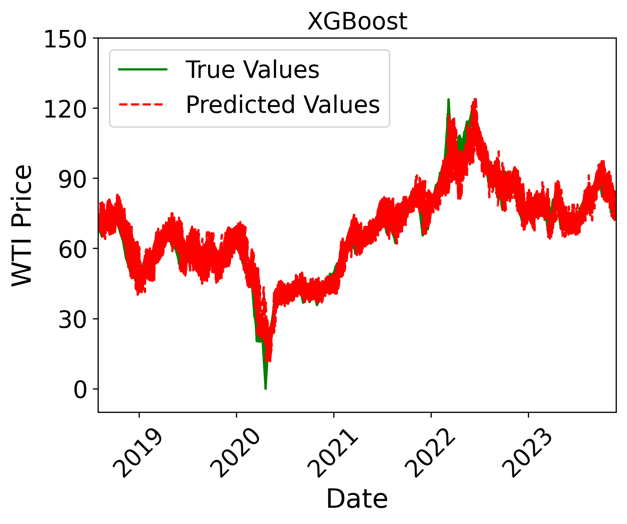


**Fig. S2** ***(Part 2)*** Predicted values versus actual values for each model for 10 days prediction


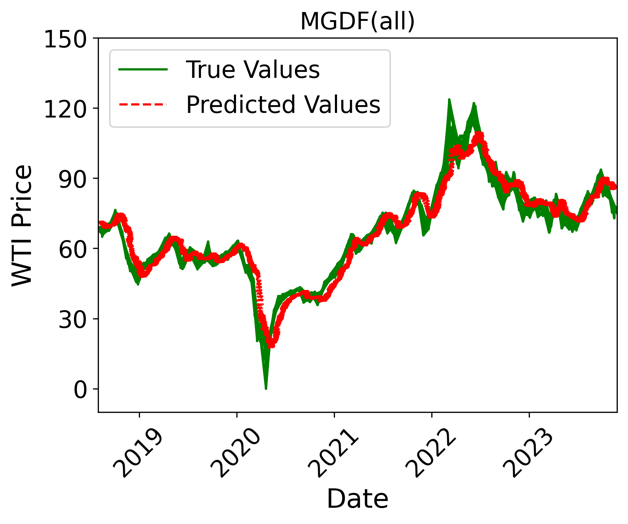

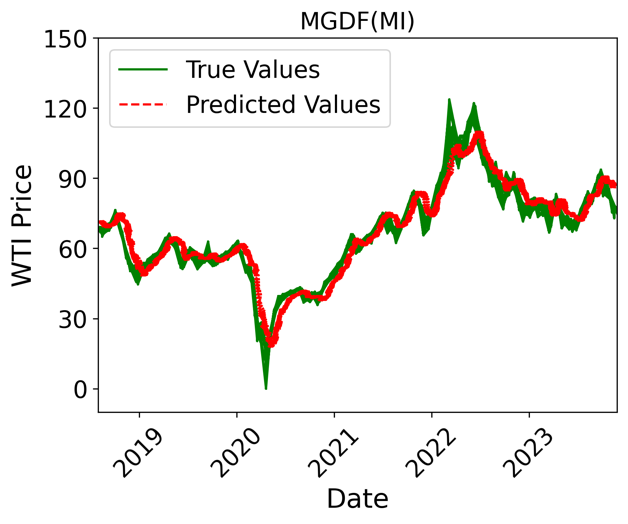

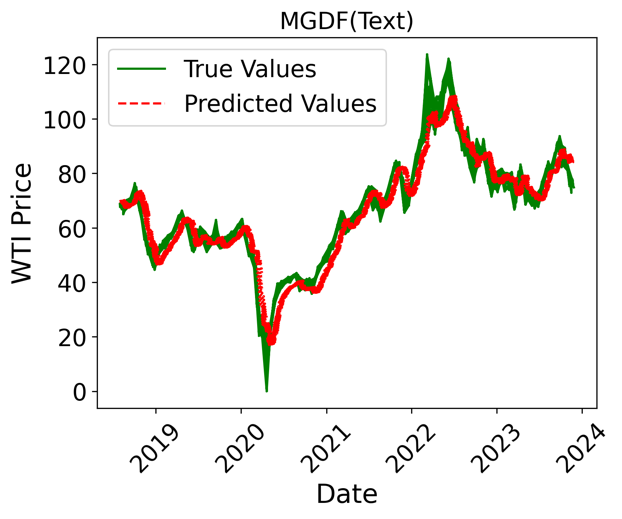


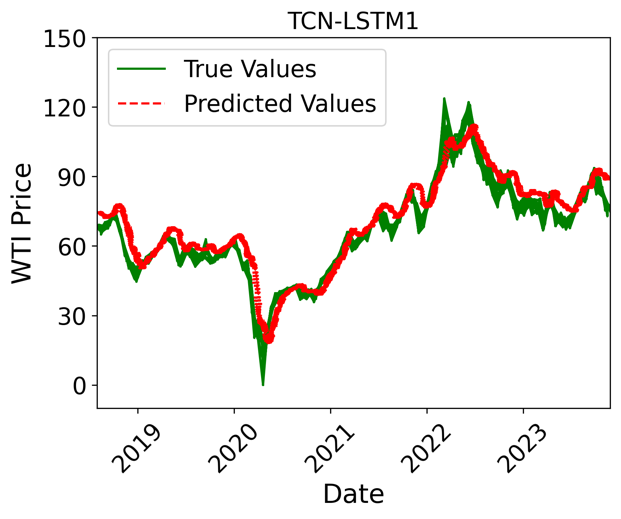

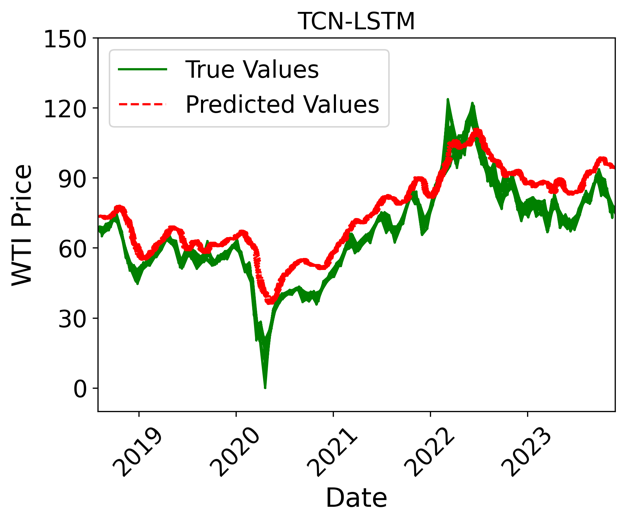

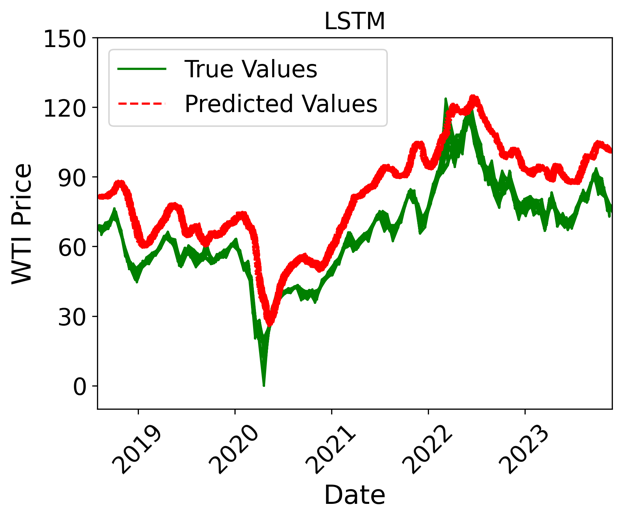


**Fig. S3** ***(Part 1)*** Predicted values versus actual values for each model for 15 days prediction


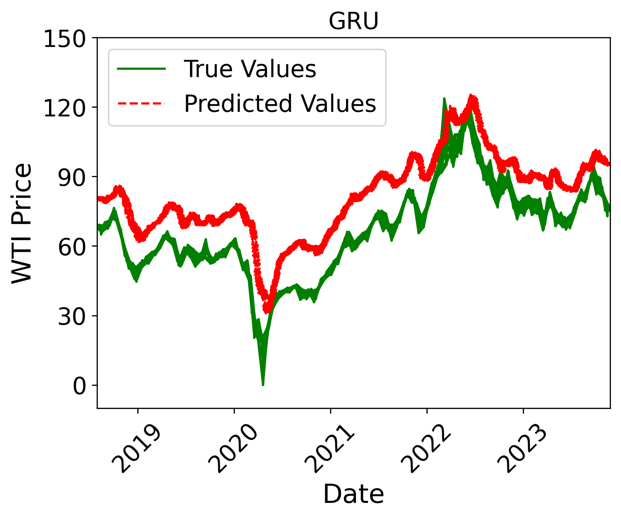

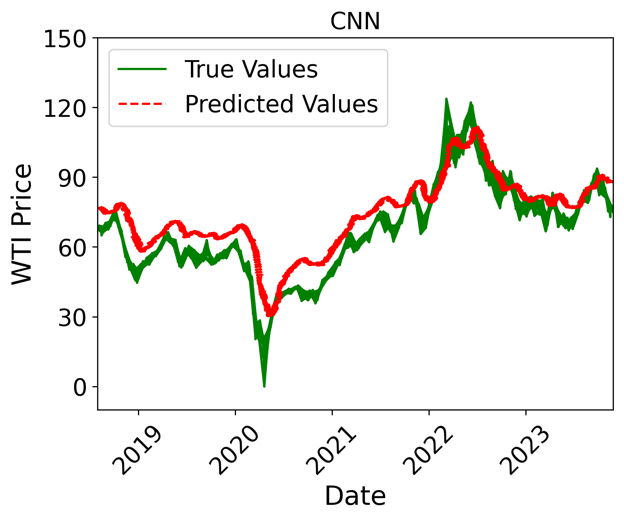

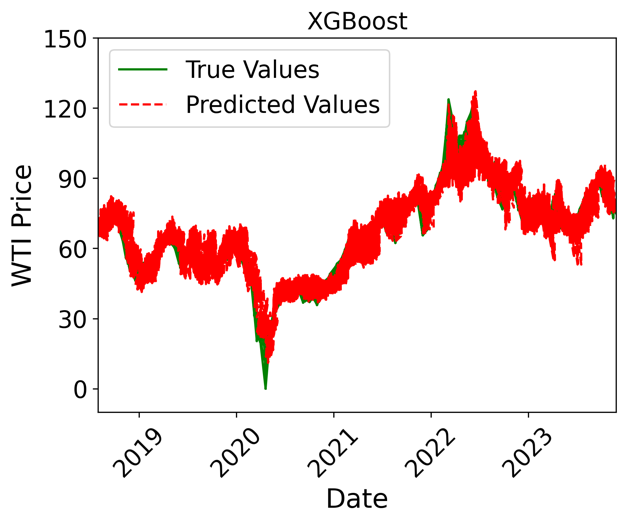


**Fig. S3** ***(Part 2)*** Predicted values versus actual values for each model for 15 days prediction


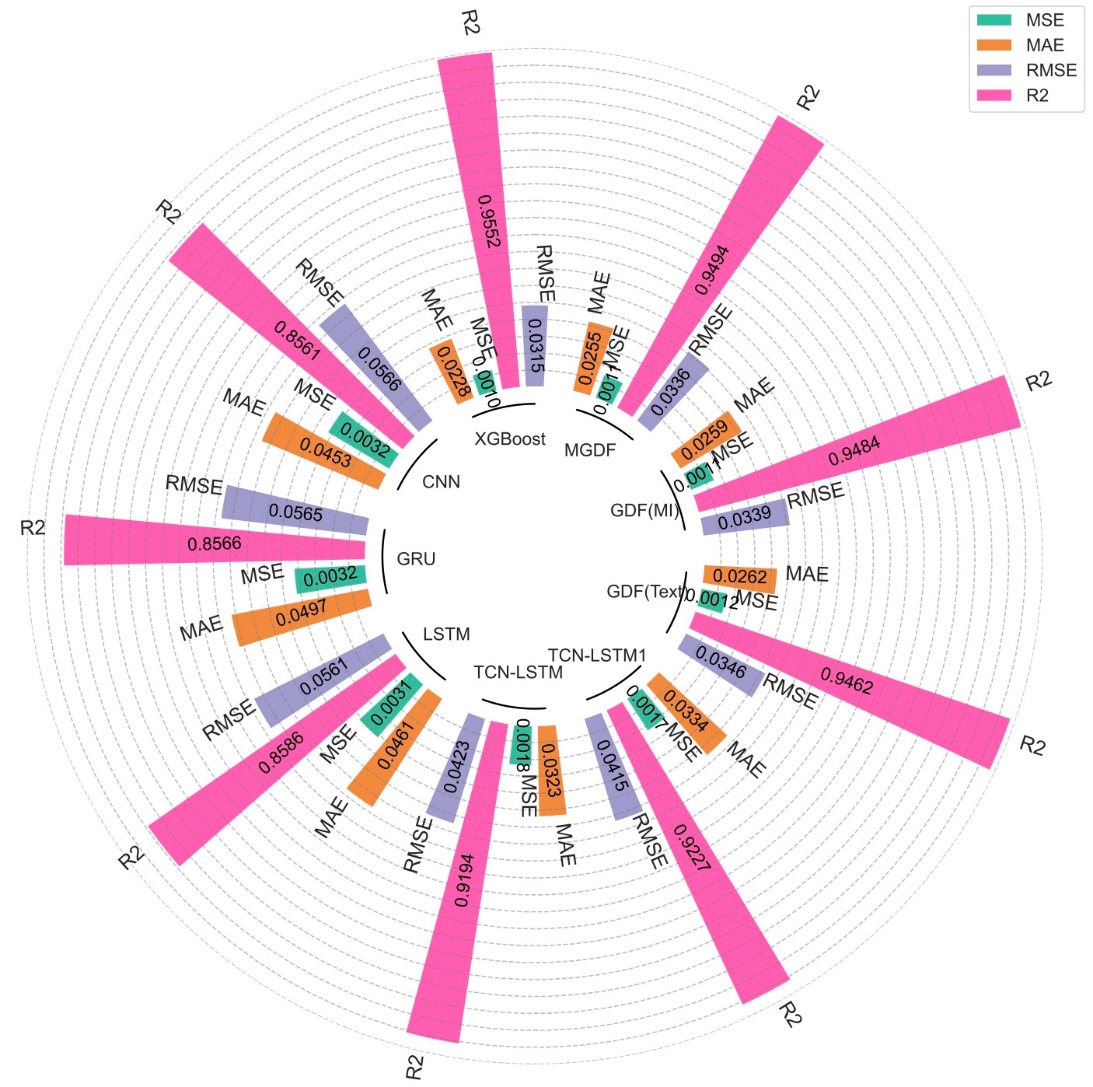


**Predict Steps: 5 days**

**Fig. S4** ***(Part 1)*** Prediction Performance of Each Model for 5 days prediction

**Fig. S4 *(Part 2)*** Prediction Performance of Each Model for 5 days prediction


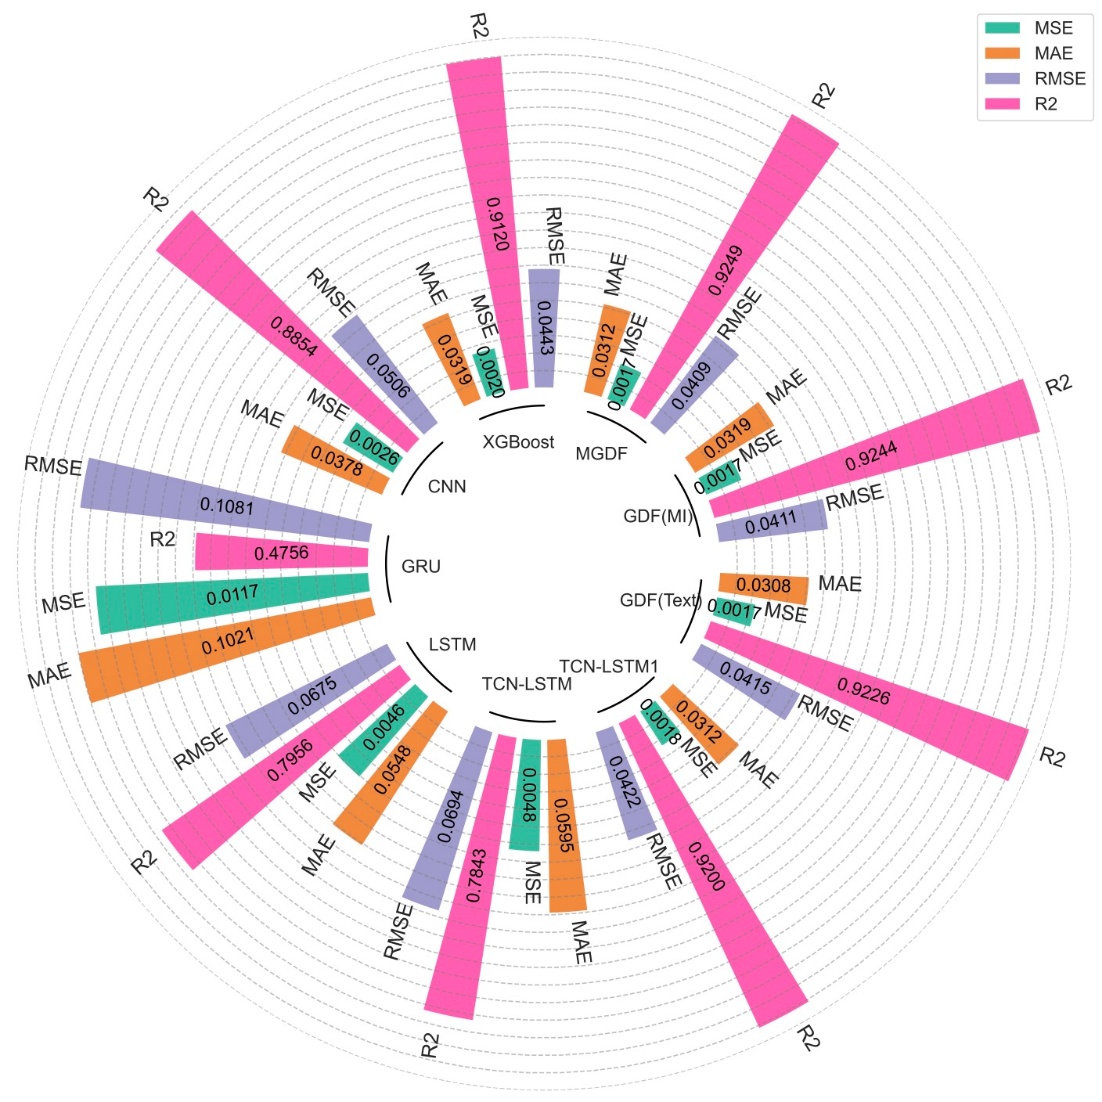


**Predict Steps: 10 days**

**Fig. S5 *(Part 1)*** Prediction Performance of Each Model for 10 days prediction

**Fig. S5 *(Part 2)*** Prediction Performance of Each Model for 10 days prediction
